# Supplementary material for: Aptasensors based on supramolecular structures of nucleic acid-stabilized Ag nanoclusters
Source: Royal Society of Chemistry journal article supplement (doi:10.1039/c4cc08263j), 2014-11-21
Supplement: c4cc08263j1.pdf [file c4cc08263j1.pdf]

## **SUPPLEMENTARY INFORMATION**

### **Aptasensors Based on Supramolecular Structures of Nucleic Acid-Stabilized Ag Nanoclusters**

**Etery Sharon<sup>‡</sup>, Natalie Enkin<sup>‡</sup>, H. Bauke Albada and Itamar Willner\***

Institute of Chemistry, The Center for Nanoscience and Nanotechnology,  
The Hebrew University of Jerusalem, Jerusalem 91904, Israel

E-mail: willnea@vms.huji.ac.il.

Phone: 972-2-6585272. Fax: 972-2-6527715

Author Contributions

E. S and N. E. <sup>‡</sup> contributed equally to this work.

## Experimental Section

### Materials

Ultrapure water from NANOpure Diamond (Barnstead International, Dubuque, IA, USA) was used for all experiments. All other reagents were purchased from Sigma-Aldrich Inc. The DNA strands were purchased from Integrated DNA Technologies Inc. (IDT). All oligonucleotides were HPLC-purified and freeze-dried by the supplier. The oligonucleotides were used as provided and dissolved in an ultrapure water to give stock solutions of 100  $\mu$ M.

The list of nucleic acids sequences used in the study include:

**(1a)** 5'-CTC TGC TCG ACG GAT TCC TCC TGG GGG AGT ATT GCG GAG GGA GGA AGG TTA AGT GT-3'

**(2a)** 5'-ACC CGA ACC TGG GCT ACC ACC CTT AAT CCC CAA TCC GTC GAG CAG AG-3'

**(3a)** 5'-ACA CTT AAC CTT TTT- IAbRQSp -3'

**(1b)** 5'-GCT GCA GAA TGG GAT CTT CAT GAC AAG GAA AAT CCT TCA ATG AAG TGG GTC AAT TAT-3'

**(2b)** 5'-CCC TTC CTT CCT TCC AAC CAA CCC ATC CCA TTC TGC AGC-3'

**(3b)** 5'-ATA ATT GAC CCA TTT-BHQ2 -3'

### Synthesis of Fluorescent Ag NCs

The 615 nm luminescent Ag NCs were synthesized by mixing 10  $\mu$ L of the nucleic acid **(2a)**, 100  $\mu$ M, with 20  $\mu$ L of a phosphate buffer solution, 20 mM, pH = 7.0. To this solution, 4  $\mu$ L of a freshly prepared aqueous solution of AgNO<sub>3</sub>, 1.5 mM, were

added, followed by the vigorous shaking of the solution for 30 seconds. After 15 minutes, 4  $\mu\text{L}$  of freshly prepared aqueous solution of  $\text{NaBH}_4$ , 1.5 mM, was added to the solution, followed by vigorous shaking of the mixture for 30 seconds. The solution was kept in dark at room temperature and was allowed to react for 3 hours. The 560 nm luminescent Ag NCs were synthesized by mixing of the nucleic acid (**2b**), as described above.

### **Preparation of the sensing modules**

The analyses were performed in a reaction volume of 120  $\mu\text{L}$  that included phosphate buffer solution, 10 mM, pH = 7.0, HEPES buffer solution, 10 mM, pH = 7.0, and 200 mM  $\text{NaNO}_3$ . The sensing modules: (**1a**)/(**2a**)/(**3a**), and (**1b**)/(**2b**)/(**3b**), 5  $\mu\text{M}$  and 7  $\mu\text{M}$ , respectively, were reacted for 30 minutes and then subjected to the respective targets. The (**1a**)/(**2a**)/(**3a**) sensing module was reacted with AMP, ATP, ADP, GMP, UMP, and the (**1b**)/(**2b**)/(**3b**) sensing module was reacted with cocaine, for different time intervals, at fixed concentrations of the targets, or for a fixed time intervals for variable concentrations of the targets.

(A)

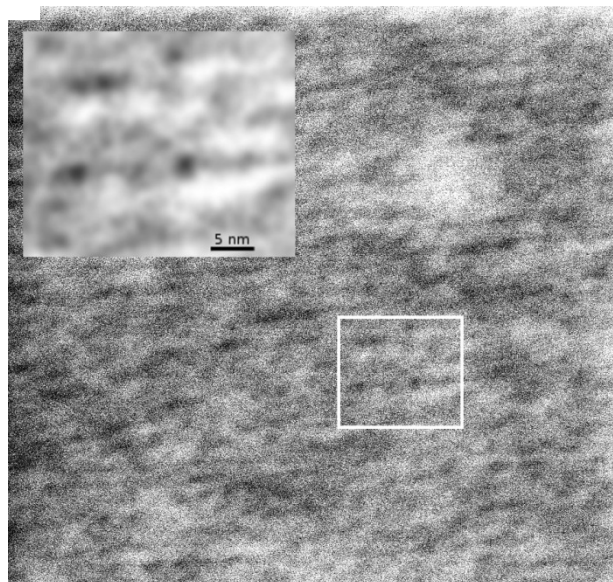

(B)

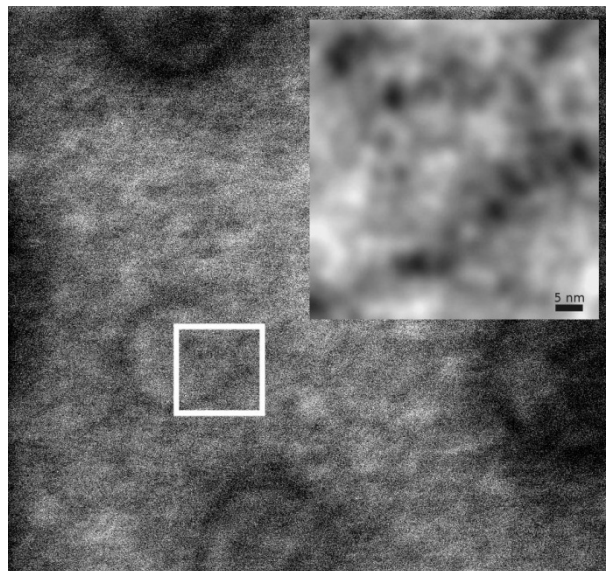

**Figure S1:** TEM images of: (A) The (2a)-stabilized AgNCs (B) The (2b)-stabilized AgNCs.

**Table S1:** Characterization of the nucleic acid modified AgNCs by ESI-MS spectrometry

ESI-MS analysis revealed the presence of 6–7 atoms in the (2a)-stabilized Ag NCs. The formula weight of the DNA is 14282.2 g/mol, and its  $[M+H]^+$  parent ion peak is detected at  $m/z = 14284.6$  (calc: 14283.2). Using this value, the following  $m/z$  values could be identified.

| 615 DNA  | found $m/z$ | calc $m/z$ | assignment              |
|----------|-------------|------------|-------------------------|
| 6 Ag NCs | 2487.0      | 2487.2     | for $[DNA-6H+6Ag]^{6-}$ |
| 7 Ag NCs | 2505.0      | 2505.2     | for $[DNA-6H+7Ag]^{6-}$ |

ESI-MS analysis revealed the presence of 4–5 atoms in the (2b)-stabilized Ag NCs. The formula weight of the DNA is 11612.9 g/mol, and its  $[M+H]^+$  parent ion peak is detected at  $m/z = 11614.9$  (calc: 11614.6). Using this value, the following  $m/z$  values could be identified.

| 560 DNA  | found $m/z$ | calc $m/z$ | assignment              |
|----------|-------------|------------|-------------------------|
| 4 Ag NCs | 2408.9      | 2408.1     | for $[DNA-5H+4Ag]^{5-}$ |
| 5 Ag NCs | 2429.4      | 2429.6     | for $[DNA-5H+5Ag]^{5-}$ |

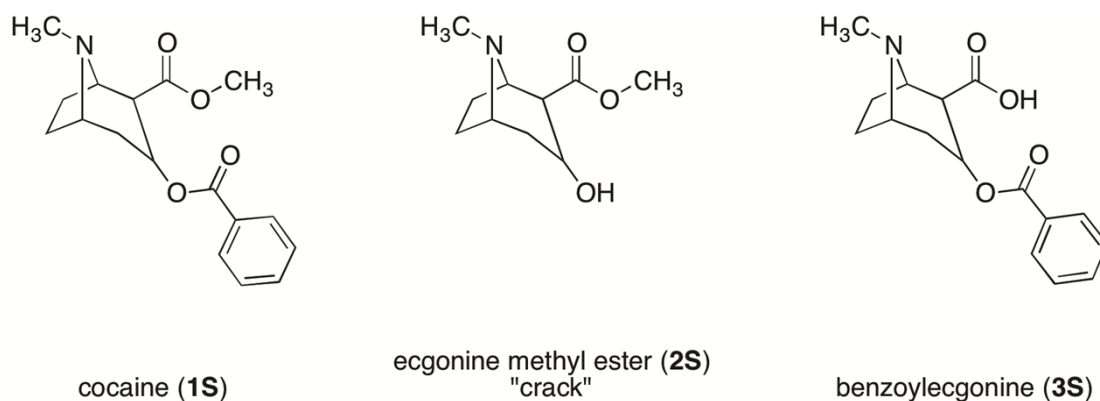

Cocaine (**1S**) and its derivatives ecgonine methylester (**2S**) and the benzoylecgonine (**3S**), the illicit drug, "crack", are metabolites of cocaine. We examine the selectivity of the sensing module shown in Figure 1 toward the discrimination of the two metabolites from cocaine.

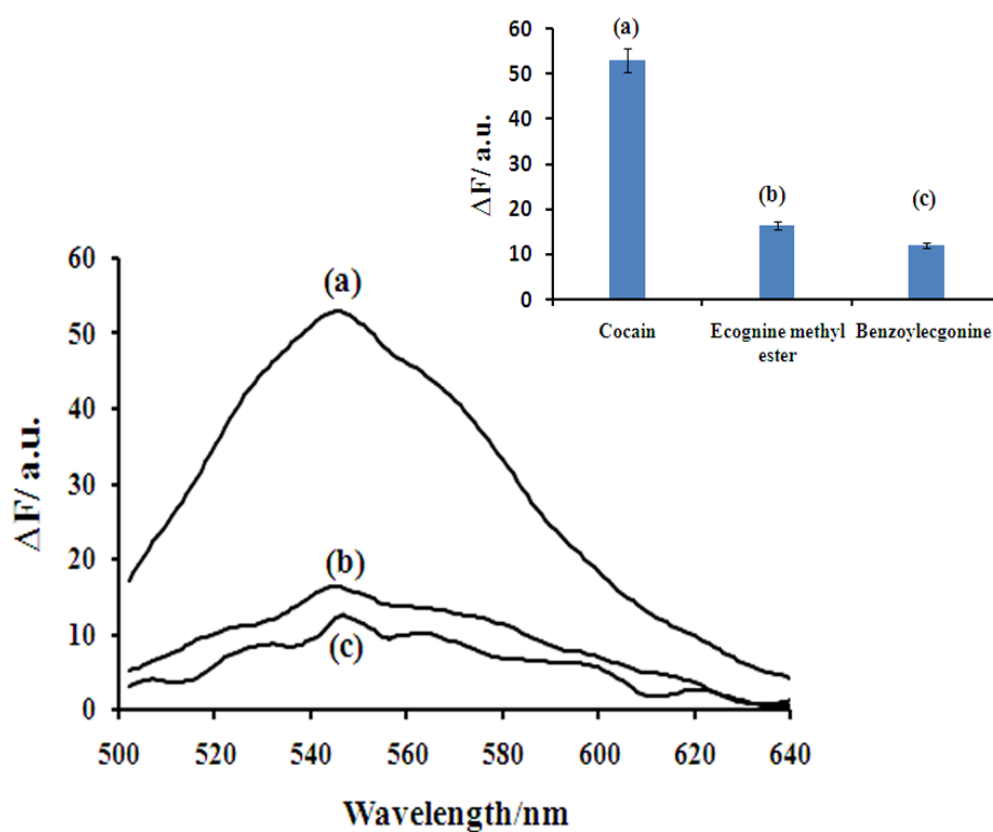

**Figure S2:** Evaluation of the sensitivity of the cocaine-sensing module shown in Figure 1

Figure S2 depicts the luminescence spectra generated by the sensing module **(1b)**/**(2b)**/**(3b)** upon analyzing cocaine, **(1S)**, 12  $\mu\text{M}$ , curve (a) and upon analyzing ecgonine methylester, **(2S)**, and of benzoylecgonine **(3S)**, 20  $\mu\text{M}$  each, curves (b) and (c), respectively. The luminescence spectra were recorded after a fixed time-interval corresponding to 85 minutes. Note that minute luminescence changes are observed for **(2S)** and **(3S)**, although the concentrations of these derivatives are 1.8-fold higher than the concentration of cocaine **(1S)**. These results indicate that the sensing module is selective towards the analysis of cocaine.
